# Supplementary material
Source: PubMed Central journal article supplement (PMC4793452)
Supplement: azam013493.ww_default.pdf [file azam013493.ww_default.pdf]

## **Web appendix: Supplementary data**

Azad MA, Coneys JG, Kozyrskyj AL, Field CJ, Ramsey CD, Becker AB, Friesen C, Abou-Setta AM, Zarychanski R. **Probiotic supplementation during pregnancy or infancy for the prevention of asthma and wheeze: A systematic review and meta-analysis.**

Table S1. Research question using PICOS structure.

Table S2. Study eligibility criteria.

Table S3. PubMed / MEDLINE search strategy

Table S4. Selection criteria associated with “allergic disease” in included studies.

Table S5. Summary risk of bias assessment.

Table S6. Relevant outcome definitions from included studies.

Table S7. Adverse events in included trials.

Figure S1. Summary risk of bias assessment.

Figure S2. Probiotics and recurrent wheeze.

Figure S3. Probiotics and withdrawal due to perceived side effects.

Figure S4. Meta-regression of time (duration of follow up) on log risk ratio for probiotics in the prevention of clinician diagnosed asthma.

**Table S1. Research question using PICOS structure.**

|                     |                                                                                                                                                                                                                                                                                                                                                                                                                                                                                                                                                                                                                                                                                                                                                                                                                    |
|---------------------|--------------------------------------------------------------------------------------------------------------------------------------------------------------------------------------------------------------------------------------------------------------------------------------------------------------------------------------------------------------------------------------------------------------------------------------------------------------------------------------------------------------------------------------------------------------------------------------------------------------------------------------------------------------------------------------------------------------------------------------------------------------------------------------------------------------------|
| <b>Population</b>   | Fetuses carried to term, or healthy term infants under 1 year of age, without recurrent wheeze or asthma.<br><i>*Since both prenatal and postnatal exposure to probiotics will be considered, the population may comprise mother-infant pairs, where the mother received probiotics during pregnancy.</i>                                                                                                                                                                                                                                                                                                                                                                                                                                                                                                          |
| <b>Intervention</b> | Probiotics (live microorganisms consumed for their presumed health benefits): any strain, preparation or dose, administered with or without prebiotics.                                                                                                                                                                                                                                                                                                                                                                                                                                                                                                                                                                                                                                                            |
| <b>Comparator</b>   | Any comparator including active comparator (non-probiotic), no intervention, or placebo.                                                                                                                                                                                                                                                                                                                                                                                                                                                                                                                                                                                                                                                                                                                           |
| <b>Outcomes</b>     | <p><i>Primary Outcome:</i></p> <ul style="list-style-type: none"> <li>• Incidence of doctor-diagnosed asthma.</li> </ul> <p><i>Secondary Outcomes:</i></p> <ul style="list-style-type: none"> <li>• Incidence of parent-reported asthma.</li> <li>• Incidence of wheeze (parent-reported or clinically-diagnosed).</li> <li>• Asthma Predictive Index score.</li> <li>• Incidence of hospitalization for asthma.</li> <li>• Incidence of asthma medication use.</li> <li>• Incidence of lower respiratory tract infection (rationale: these infections generally include wheeze).</li> </ul> <p><i>Safety Outcomes:</i></p> <ul style="list-style-type: none"> <li>• Severe gastrointestinal disturbances</li> <li>• Allergic reaction to probiotic</li> <li>• Withdrawal due to perceived side effects</li> </ul> |
| <b>Study design</b> | Prospective randomized controlled trials.                                                                                                                                                                                                                                                                                                                                                                                                                                                                                                                                                                                                                                                                                                                                                                          |

**Table S2. Study eligibility criteria.**

|                           |                                                                                                                                                                                                                                                                                                                                                                                                                                                                                                                                        |
|---------------------------|----------------------------------------------------------------------------------------------------------------------------------------------------------------------------------------------------------------------------------------------------------------------------------------------------------------------------------------------------------------------------------------------------------------------------------------------------------------------------------------------------------------------------------------|
| <b>Inclusion Criteria</b> | <ol style="list-style-type: none"><li>1. Prospective, randomized, controlled trial.</li><li>2. Prenatal or postnatal administration of probiotics to mother or infant: any type, dose, route or frequency.</li><li>3. Majority of infants (&gt;80%) must be under 1 year of age, or unborn, at randomization.</li><li>4. Majority of infants (&gt;80%) must be healthy (not suffering from acute illness) at randomization. Infants with allergic disorders (other than wheeze or asthma) remain eligible.</li></ol>                   |
| <b>Exclusion Criteria</b> | <ol style="list-style-type: none"><li>1. Non-human studies.</li><li>2. Observational study designs, quasi-randomized, cross-over, or cluster randomized trials.</li><li>3. Study primarily enrolled infants with documented wheeze or asthma.</li><li>4. Majority of enrolled children were preterm infants (born at less than 36 completed weeks of gestation).</li><li>5. All subjects received probiotics.</li><li>6. No outcomes of importance to the review were reported, or available via contact with trial authors.</li></ol> |

**Table S3. PubMed / MEDLINE search strategy**

|                                                                                                                                                                                                                                                                                                                                                                                                                                                                                                                          |
|--------------------------------------------------------------------------------------------------------------------------------------------------------------------------------------------------------------------------------------------------------------------------------------------------------------------------------------------------------------------------------------------------------------------------------------------------------------------------------------------------------------------------|
| <ol style="list-style-type: none"><li>1. probiotic* OR lactobacill* OR bifidobacteri*</li><li>2. probiotics[MeSH Terms]</li><li>3. infant* OR infancy OR newborn* OR neonat* OR pediatric* OR paediatric*</li><li>4. infant[MeSH Terms]</li><li>5. (randomized controlled trial[pt] OR controlled clinical trial[pt] OR randomized[tiab] OR placebo[tiab] OR drug therapy[sh] OR randomly[tiab] OR trial[tiab] OR groups[tiab]) NOT (animals [mh] NOT humans [mh])</li><li>6. (#1 OR #2) AND (#3 OR #4) AND #5</li></ol> |
|--------------------------------------------------------------------------------------------------------------------------------------------------------------------------------------------------------------------------------------------------------------------------------------------------------------------------------------------------------------------------------------------------------------------------------------------------------------------------------------------------------------------------|

**Table S4. Selection criteria associated with “allergic disease” in included trials.**

| <b>Primary Article</b> | <b>Allergic disease-related selection criteria</b>                                                                                     |
|------------------------|----------------------------------------------------------------------------------------------------------------------------------------|
| West 2009              | None (subgroup analyses performed, with infants classified as high risk for allergy when first-degree relative has “allergic disease”) |
| Abrahamsson 2007       | First-degree relative has eczema, asthma, gastrointestinal allergy, allergic urticaria, or ARC                                         |
| Kalliomaki 2001        | First-degree relative has AD, AR, or asthma                                                                                            |
| Niers 2009             | AD, AR, food allergy, or asthma in either the mother, or the father plus an older sibling                                              |
| Wickens 2008           | Parent has history of treated asthma, eczema, or hay fever                                                                             |
| Kukkonen 2007          | Parent has diagnosed AR, AD or asthma.                                                                                                 |
| Taylor 2007            | Mother has diagnosed asthma, AR or eczema plus positive skin prick test                                                                |
| Gore 2012              | Infant has diagnosed AD (SCORAD $\geq$ 10)                                                                                             |
| Ou 2012                | Mother has diagnosed asthma, eczema, food allergy or AR and elevated total IgE                                                         |
| Dotterud 2010          | None (subgroup analyses performed, with family history defined as: first-degree relative with AD, ARC, or asthma)                      |
| Kopp 2008              | First-degree relative has AD, AR, or asthma and confirmed allergic sensitization against an inhalant allergen                          |
| van der Aa 2011        | Infant has AD (SCORAD > 15)                                                                                                            |
| Hol 2008               | Infant has cow’s milk allergy diagnosed with food challenge                                                                            |
| Boyle 2011             | First-degree relative has diagnosed AR, eczema, food allergy or asthma                                                                 |
| Maldonado 2012         | None                                                                                                                                   |
| Chouraqui 2008         | None                                                                                                                                   |
| Gruber 2007            | Infant has mild-to-moderate AD (SCORAD 15 – 40)                                                                                        |
| Allen 2010             | First-degree relative has diagnosed asthma, eczema or AR (primarily; some women without family history were also recruited)            |
| Hascoet 2011           | None                                                                                                                                   |
| Puccio 2007            | None                                                                                                                                   |

AD, atopic dermatitis; AR, allergic rhinitis; ARC, allergic rhinoconjunctivitis; SCORAD, index for SCORing Atopic Dermatitis.

**Table S5. Summary risk of bias assessment.**

| Primary Article  | OVERALL | Random sequence generation | Allocation concealment | Blinding of participants and personnel | Blinding of outcome assessment | Incomplete outcome data        | Selective reporting        | Other sources of bias |
|------------------|---------|----------------------------|------------------------|----------------------------------------|--------------------------------|--------------------------------|----------------------------|-----------------------|
| West 2009        | HIGH    | Low                        | Low                    | Low                                    | Low                            | Low (1y)<br>High (8y)          | Low                        | Low                   |
| Abrahamsson 2007 | HIGH    | Low                        | Low                    | Low (2y)<br>High (7y)                  | Low (2y)<br>High (7y)          | High                           | Low                        | Low                   |
| Kalliomaki 2001  | UNCLEAR | Low                        | Low                    | Low                                    | Low                            | Unclear (2y)<br>Unclear (4/7y) | Unclear (2y)<br>Low (4/7y) | Low                   |
| Niers 2009       | HIGH    | Unclear                    | Low                    | Low (2y)<br>High (6y)                  | Low                            | High (2y)<br>High (6y)         | Low                        | Low                   |
| Wickens 2008     | HIGH    | Low                        | Low                    | Low (2y)<br>High (4y & 6y)             | Low                            | Low (2y & 4y)<br>Unclear (6y)  | Low                        | Low                   |
| Kukkonen 2007    | UNCLEAR | Low                        | Low                    | Low                                    | Low                            | Low (2y)<br>Unclear (5y)       | Low                        | Low                   |
| Taylor 2007      | HIGH    | Low                        | Low                    | Low                                    | Low                            | High (2.5y)<br>High (5y)       | Low                        | Low                   |
| Gore 2012        | UNCLEAR | Low                        | Unclear                | Low                                    | Low                            | Low                            | Unclear                    | Unclear               |
| Ou 2012          | HIGH    | Unclear                    | Low                    | Low                                    | Low                            | High                           | Unclear                    | Low                   |
| Dotterud 2010    | HIGH    | Low                        | Low                    | Low                                    | Low                            | High                           | Low                        | Low                   |
| Kopp 2008        | LOW     | Low                        | Low                    | Low                                    | Low                            | Low                            | Low                        | Low                   |
| van der Aa 2011  | HIGH    | Low                        | Low                    | Low                                    | Low                            | High                           | High                       | Low                   |
| Hol 2008         | UNCLEAR | Low                        | Low                    | Low                                    | Low                            | Unclear                        | Low                        | Low                   |
| Boyle 2011       | UNCLEAR | Low                        | Low                    | Low                                    | Low                            | Unclear                        | Unclear                    | Low                   |
| Maldonado 2012   | HIGH    | Low                        | Low                    | Low                                    | Low                            | High                           | Low                        | Low                   |
| Chouraqui 2008   | UNCLEAR | Low                        | Low                    | Low                                    | Low                            | Unclear                        | Low                        | Unclear               |
| Gruber 2007      | UNCLEAR | Low                        | Unclear                | Low                                    | Unclear                        | Low                            | Unclear                    | Low                   |
| Allen 2010       | UNCLEAR | Low                        | Low                    | Low                                    | Low                            | Unclear                        | Low                        | Low                   |
| Hascoet 2011     | UNCLEAR | Low                        | Low                    | Low                                    | Low                            | Unclear                        | Low                        | Low                   |
| Puccio 2007      | HIGH    | Low                        | Low                    | Low                                    | Low                            | High                           | Low                        | Low                   |

Risk of bias assessed according to the Cochrane Collaboration Risk of Bias tool. Some domains were re-assessed after extended follow up (shown in brackets). Trials are listed according to follow-up duration, as in Table 1.

**Table S6. Relevant outcome definitions from included trials.**

| Primary Article  | Diagnosed Asthma                                                                                                                                                                                                                                                                                                                                                   | Wheeze                                                                                                                                                                              | Lower Respiratory Tract Infection                                                                                                                       |
|------------------|--------------------------------------------------------------------------------------------------------------------------------------------------------------------------------------------------------------------------------------------------------------------------------------------------------------------------------------------------------------------|-------------------------------------------------------------------------------------------------------------------------------------------------------------------------------------|---------------------------------------------------------------------------------------------------------------------------------------------------------|
| West 2009        | Age 1: Parent-reported doctor diagnosis; verified by examination of health records, and prescription of inhalant steroids.<br>Age 8: Parent-reported doctor diagnosis, with wheeze that responded to bronchodilator therapy and/or a clinical history of wheeze and increase in FEV <sub>1</sub> > 12% from baseline following terbutalin inhalation.              | Modified ISAAC questionnaire ("ever wheezing or whistling in the chest")                                                                                                            | NR                                                                                                                                                      |
| Abrahamsson 2007 | Age 2: ≥ 3 wheezing episodes, at least 1 verified by a physician<br>Age 7: At least one of: 1) doctor diagnosis and asthma symptoms and/or medication during last 12 months; 2) wheeze or nocturnal cough and positive reversibility test and/or pathological FENO value. If the based on doctor diagnosis, medical records were reviewed to confirm GINA criteria | Modified ISAAC questionnaire (episode with obstructive airway symptoms)                                                                                                             | NR                                                                                                                                                      |
| Kalliomaki 2001  | Age 2: Chronic or recurrent cough, wheeze or shortness of breath, and effective antiasthma treatment<br>Age 4: Chronic or recurrent cough, wheeze, or shortness of breath requiring regular inhaled corticosteroids<br>Age 7: Qualified for asthma medication reimbursement                                                                                        | NR                                                                                                                                                                                  | NR                                                                                                                                                      |
| Niers 2009       | Age 6: At least one of: physician diagnosed asthma active in past 12 months, parent reported wheeze in past 12 months (modified ISAAC questionnaire), use of asthma medication in past 12 months and/or ≥9% reversibility in FEV <sub>0.5</sub> or FEV <sub>1</sub> .                                                                                              | Age 2: Adapted British Medical Research Council questionnaire and European Community Respiratory Health Survey.                                                                     | NR                                                                                                                                                      |
| Wickens 2008     | Age 6: ISAAC questionnaire (history of asthma) plus wheeze or inhaler use in last 12 months                                                                                                                                                                                                                                                                        | ISAAC questionnaire                                                                                                                                                                 | NR                                                                                                                                                      |
| Kukkonen 2007    | Age 2: ≥ 2 physician-diagnosed wheezing episodes with persistent cough or exercise-induced symptoms<br>Age 5: as above, or reversible bronchial obstruction by oscillometry                                                                                                                                                                                        | NR                                                                                                                                                                                  | NR                                                                                                                                                      |
| Taylor 2007      | Age 2.5: recurrent wheezing (≥ 3 episodes, at least 1 confirmed by a physician) and responded to bronchodilator therapy<br>Age 5: recurrent wheeze (>2 episodes in last 12 months) and responded to bronchodilator therapy                                                                                                                                         | Parents reporting "noisy breathing" were asked to give detailed descriptions. Only children with a convincing history of 'wheeze' (or physician documented wheeze) were classified. | Physician-confirmed chest infection (excludes 'upper respiratory infections' limited to coryzal symptoms in the absence of significant chest symptoms). |
| Gore 2012        | Doctor-diagnosed asthma. (Reported in text only.                                                                                                                                                                                                                                                                                                                   | Interviewer-administered validated respiratory                                                                                                                                      | NR                                                                                                                                                      |

|                 | Authors declined to provide data.)                                                                                                                                                              | questionnaire                                                                                                             |                                                                                                                                                                                                                                                                       |
|-----------------|-------------------------------------------------------------------------------------------------------------------------------------------------------------------------------------------------|---------------------------------------------------------------------------------------------------------------------------|-----------------------------------------------------------------------------------------------------------------------------------------------------------------------------------------------------------------------------------------------------------------------|
| Ou 2012         | ≥ 3 episodes of wheezing/coughing, requiring bronchodilator treatment, and diagnosed by a physician                                                                                             | NR (authors clarified that in their report, “wheezing ever” actually refers to their asthma outcome, defined to the left) | NR                                                                                                                                                                                                                                                                    |
| Dotterud 2010   | ≥ 3 wheezing episodes in last 12 months plus treatment by inhaled steroids, or signs of hyper-reactivity (cough or wheeze at excitement or impaired night sleep) without respiratory infection. | NR                                                                                                                        | NR                                                                                                                                                                                                                                                                    |
| Kopp 2008       | NR                                                                                                                                                                                              | ≥ 5 episodes of wheezing bronchitis during the first 2 years (by parent report)                                           | NR                                                                                                                                                                                                                                                                    |
| van der Aa 2011 | NR                                                                                                                                                                                              | ≥3 episodes of wheezing, and wheezing apart from colds                                                                    | NR                                                                                                                                                                                                                                                                    |
| Hol 2008        | NR                                                                                                                                                                                              | Structured interview                                                                                                      | NR                                                                                                                                                                                                                                                                    |
| Boyle 2011      | NR                                                                                                                                                                                              | Not defined                                                                                                               | NR                                                                                                                                                                                                                                                                    |
| Maldonado 2012  | NR                                                                                                                                                                                              | NR                                                                                                                        | Diagnosis by study pediatrician: mucosity and/or cough during ≥ 2 consecutive days with or without fever and presence of wheezing and/or crepitations, including acute bronchitis, bronchiolitis, and pneumonia.                                                      |
| Chourraqui 2008 | NR                                                                                                                                                                                              | NR                                                                                                                        | Bronchiolitis as serious AE. AEs recorded by investigators or physician, coded using Medical Dictionary for Regulatory Activities, and considered serious if life threatening, caused permanent harm, required hospitalization, or was considered medically relevant. |
| Gruber 2007     | NR                                                                                                                                                                                              | NR                                                                                                                        | LRTI as AE: no definition provided.                                                                                                                                                                                                                                   |
| Allen 2010      | NR                                                                                                                                                                                              | NR                                                                                                                        | Unspecified acute lower respiratory infection (ICD10 J22) or Bronchiolitis (J21.9), based on parent report and categorized independently by 2 pediatricians using ICD10 criteria.                                                                                     |
| Hascoet 2011    | NR                                                                                                                                                                                              | NR                                                                                                                        | Lower Respiratory AE. AEs defined as illnesses or symptoms that occurred or worsened during the study. Recorded and evaluated by investigators.                                                                                                                       |
| Puccio 2007     | NR                                                                                                                                                                                              | Parent-reported                                                                                                           | NR                                                                                                                                                                                                                                                                    |

AE, adverse event; ICD10, International Classification of Diseases; FENO, exhaled nitric oxide; FEV<sub>1</sub>, forced expiratory volume in 1 second; GINA, Global Initiative for Asthma; ISAAC, International Study of Asthma and Allergies in Childhood; LRTI, lower respiratory tract infection; NR, outcome not reported.

**Table S7. Adverse events in included trials.**

| Primary Article  | Severe Gastrointestinal Disturbance |               | Allergic Reaction |           | Withdrawal Due to Perceived Side Effects |              |
|------------------|-------------------------------------|---------------|-------------------|-----------|------------------------------------------|--------------|
|                  | Probiotic                           | Control       | Probiotic         | Control   | Probiotic                                | Control      |
| West 2009        | NR                                  | NR            | NR                | NR        | NR                                       | NR           |
| Abrahamsson 2007 | 1/106 (0.9%)                        | 1/103 (1.0%)  | NR                | NR        | 2/117 (1.7%)                             | 1/115 (0.9%) |
| Kalliomaki 2001  | NR                                  | NR            | NR                | NR        | NR                                       | NR           |
| Niers 2009       | NR                                  | NR            | NR                | NR        | NR                                       | NR           |
| Wickens 2008     | NR                                  | NR            | NR                | NR        | 3/341 (0.9%)                             | 1/171 (0.6%) |
| Kukkonen 2007    | 7/610 (1.1%)                        | 12/613 (2.0%) | NR                | NR        | 2/610 (0.3%)                             | 4/613 (0.7%) |
| Taylor 2007      | NR                                  | NR            | NR                | NR        | 3/111 (2.7%)                             | 1/115 (0.9%) |
| Gore 2012        | NR                                  | NR            | NR                | NR        | NR                                       | NR           |
| Ou 2012          | NR                                  | NR            | NR                | NR        | NR                                       | NR           |
| Dotterud 2010    | NR                                  | NR            | NR                | NR        | NR                                       | NR           |
| Kopp 2008        | NR                                  | NR            | NR                | NR        | NR                                       | NR           |
| van der Aa 2011  | 0/46 (0%)                           | 0/44 (0%)     | NR                | NR        | 1/46 (2.2%)                              | 1/44 (2.3%)  |
| Hol 2008         | NR                                  | NR            | NR                | NR        | 0/59 (0%)                                | 0/60 (0%)    |
| Boyle 2011       | NR                                  | NR            | NR                | NR        | 1/125 (0.8%)                             | 1/125 (0.8%) |
| Maldonado 2012   | NR                                  | NR            | NR                | NR        | NR                                       | NR           |
| Chouraqui 2008   | 0/214 (0%)                          | 2/70 (1.4%)   | 2/214 (0.9%)      | 0/70 (0%) | NR                                       | NR           |
| Gruber 2007      | 1/56 (1.8%)                         | 0/50 (0%)     | NR                | NR        | NR                                       | NR           |
| Allen 2010       | NR                                  | NR            | NR                | NR        | NR                                       | NR           |
| Hascoet 2011     | NR                                  | NR            | NR                | NR        | 4/40 (10.0%)                             | 1/40 (2.5%)  |
| Puccio 2007      | NR                                  | NR            | NR                | NR        | NR                                       | NR           |

NR, not reported.



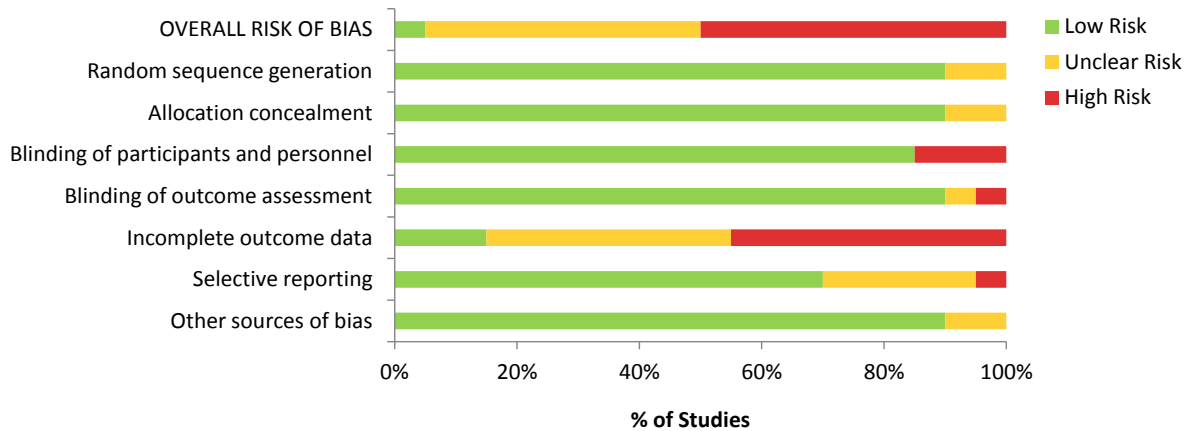

**Figure S1. Summary risk of bias assessment.** Included trials (n=20) were assessed for internal validity using the Cochrane Collaboration’s Risk of Bias tool (see also Table S4), which evaluates 7 sources of bias across 6 domains. The percentage of trials adjudicated to be of low, unclear and high risk of bias, for each domain, are shown here.

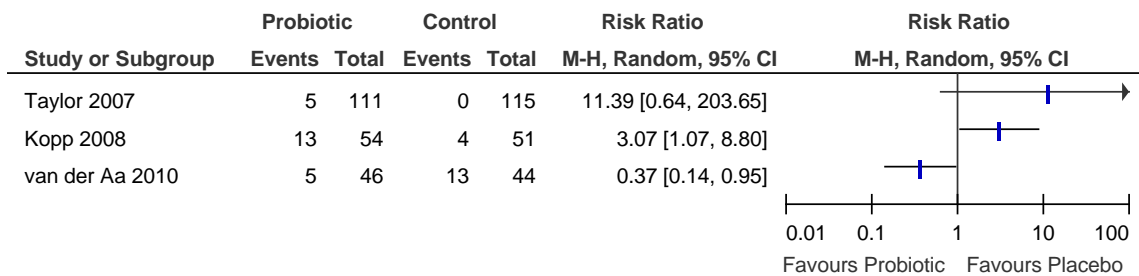

**Figure S2. Probiotic supplementation during pregnancy or infancy and recurrent wheeze in children.** The longest available follow up data (intention to treat) were extracted from each contributing trial. Trials are sorted in order of decreasing duration of follow up. Pooled effect estimates are not presented due to substantial statistical ( $I^2 = 83\%$ ) and clinical heterogeneity. CI, confidence interval; M-H, Mantel-Haenszel.

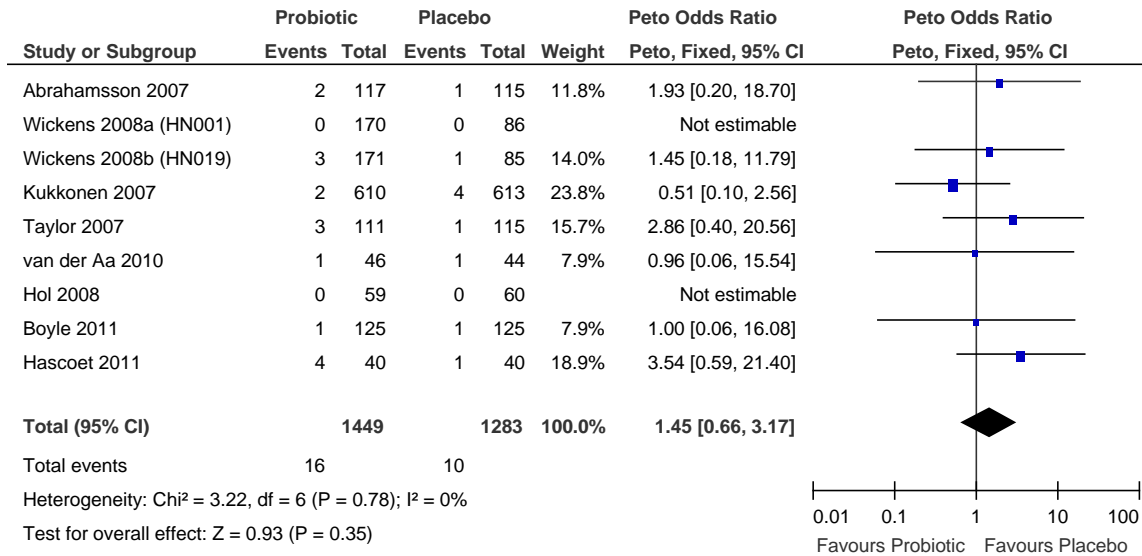

**Figure S3. Probiotic supplementation during pregnancy or infancy and withdrawal due to perceived side effects.** The longest available follow up data (intention to treat) were extracted from each contributing trial. Trials are sorted in order of decreasing duration of follow up. CI, confidence interval; df, degrees of freedom.

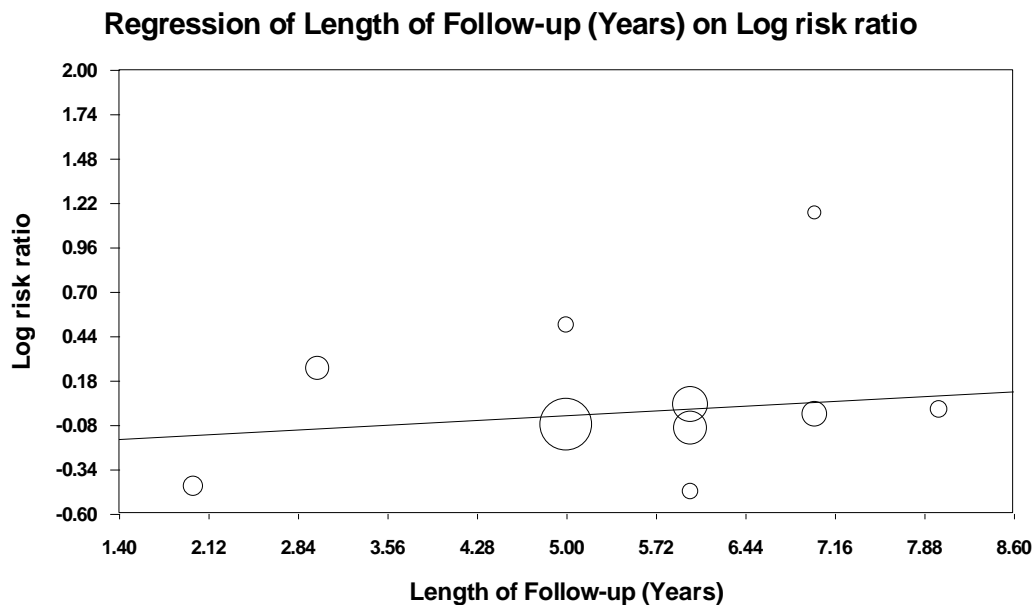

**Figure S4. Meta-regression of time (duration of follow up) on log risk ratio for probiotic supplementation during pregnancy or infancy in the prevention of clinician diagnosed asthma (n = 9 trials).** Mixed effects regression model (method of moments); p = 0.65. One three-arm trial (Wickens et al.) evaluated two different probiotics, which are plotted separately.
